# Supplementary material for: Highly conductive triple-layered hollow MnO2@SnO2@NHCS nanospheres with excellent lithium storage capacity for high performance lithium-ion batteries
Source: Royal Society of Chemistry journal article supplement (doi:10.1039/d1nj03207k), 2021-01-01
Supplement: d1nj03207k1.pdf [file d1nj03207k1.pdf]

## Supporting Information

### **Highly conductive triple-layered hollow MnO<sub>2</sub>@SnO<sub>2</sub>@NHCS nanospheres with excellent lithium storage for high performance lithium-ion batteries**

Yameng Mei,<sup>a</sup> Jin'an Zhao,<sup>\*ab</sup> Liyun Dang,<sup>\*c</sup> Jiyong Hu,<sup>c</sup> Yan Guo,<sup>c</sup> and Shuaiguo Zhang,<sup>c</sup>

<sup>a</sup> College of Chemistry, Zhengzhou University, Zhengzhou 450001

<sup>b</sup> College of Chemical Engineering and Dyeing Engineering, Henan University of Engineering, Zhengzhou  
450001, \*E-mail:zjinan@zzu.edu.cn

<sup>c</sup> School of Material and Chemical Engineering, Henan University of Urban Construction,  
Pingdingshan 467036, \*E-mail:20161010@hncj.edu.cn

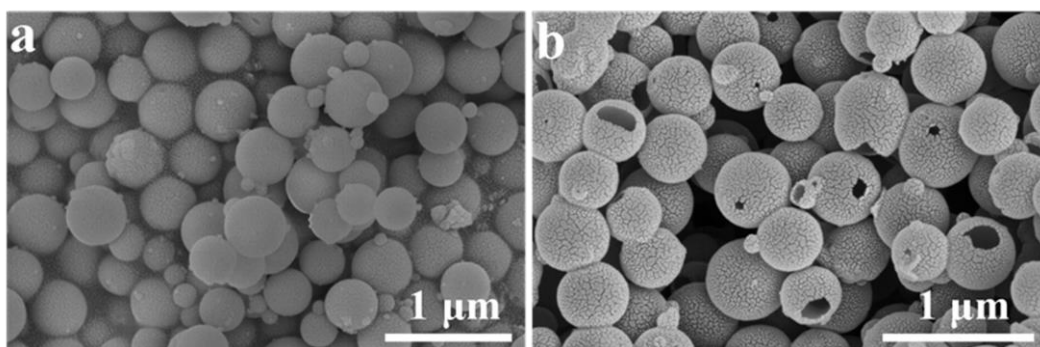

Fig. S1 FESEM images of (a) SiO<sub>2</sub> templates and (b) NHCS nanospheres.

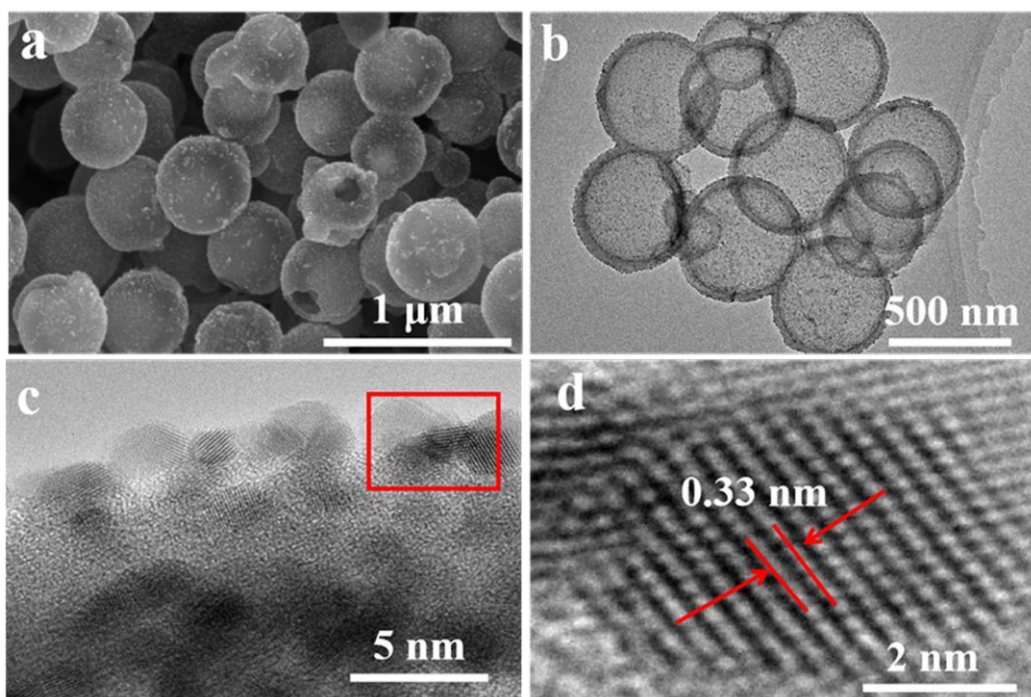

Fig. S2 FESEM(a), TEM(b) and HRTEM(c, d) images of SnO<sub>2</sub>@NHCS.

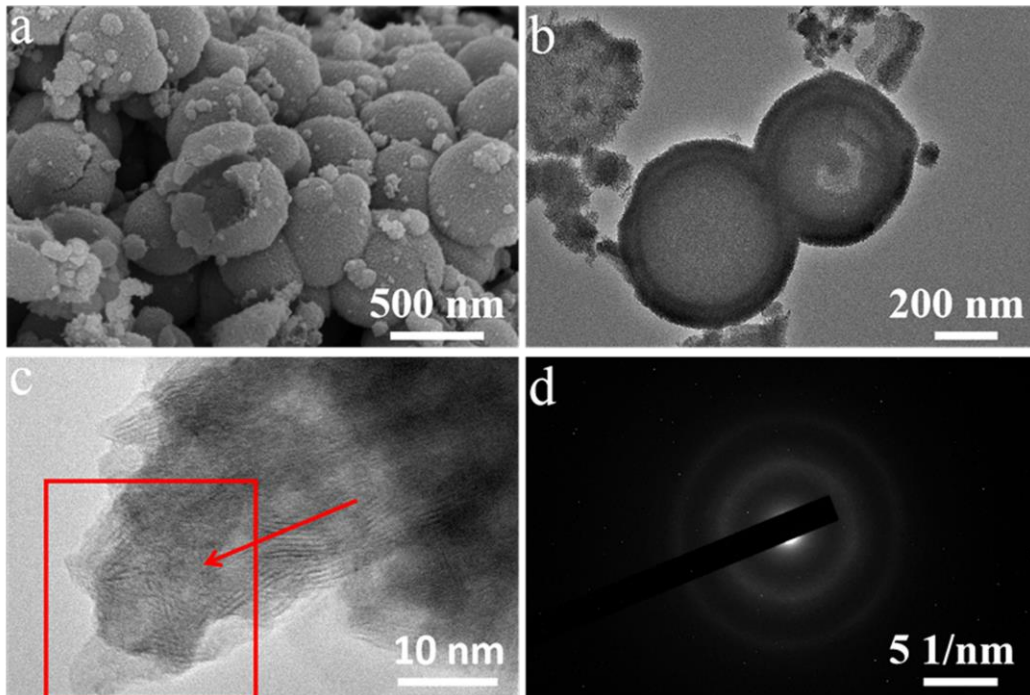

Fig. S3 FESEM(a), TEM(b), HRTEM(c) and SAED(d) images of  $\text{MnO}_2@NHCS$ .

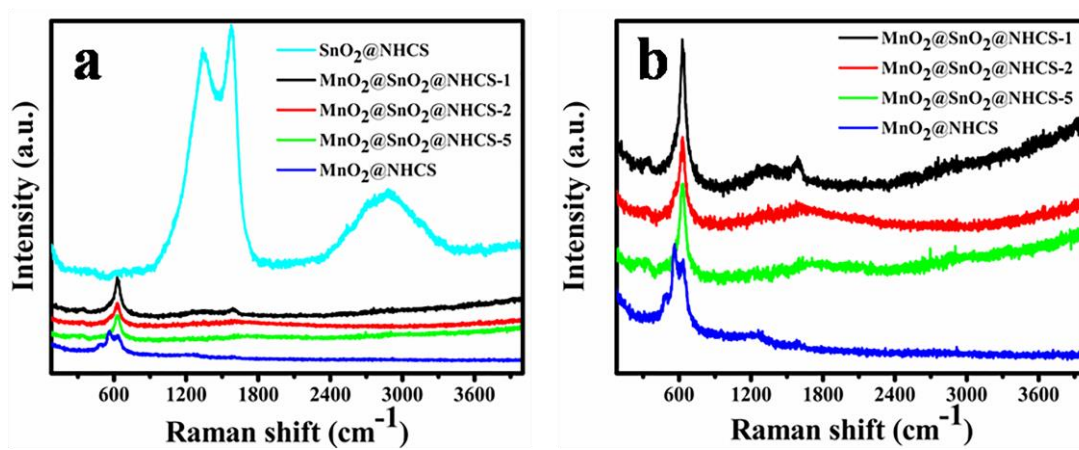

Fig. S4 Raman Spectra of  $\text{SnO}_2@NHCS$ ,  $\text{MnO}_2@SnO_2@NHCS-1$ ,  $\text{MnO}_2@SnO_2@NHCS-2$ ,  $\text{MnO}_2@SnO_2@NHCS-5$ , and  $\text{MnO}_2@NHCS$

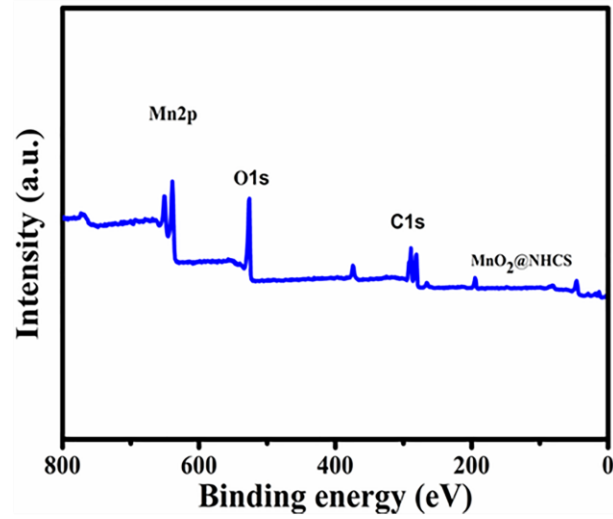

Fig. S5 XPS spectra of MnO<sub>2</sub>@NHCS.

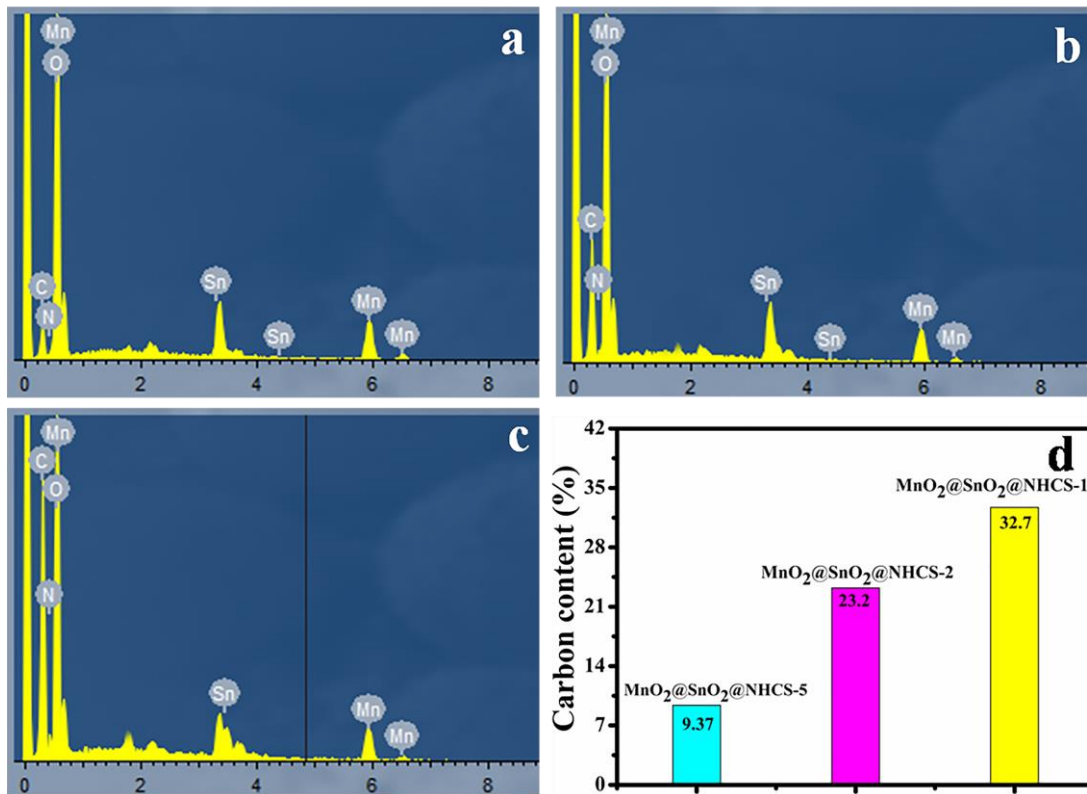

Fig. S6 EDX point spectra of (a) MnO<sub>2</sub>@SnO<sub>2</sub>@NHCS-5, (b) MnO<sub>2</sub>@SnO<sub>2</sub>@NHCS-2, (c) MnO<sub>2</sub>@SnO<sub>2</sub>@NHCS-1 and (d) carbon content of MnO<sub>2</sub>@SnO<sub>2</sub>@NHCS-5, MnO<sub>2</sub>@SnO<sub>2</sub>@NHCS-2, MnO<sub>2</sub>@SnO<sub>2</sub>@NHCS-1

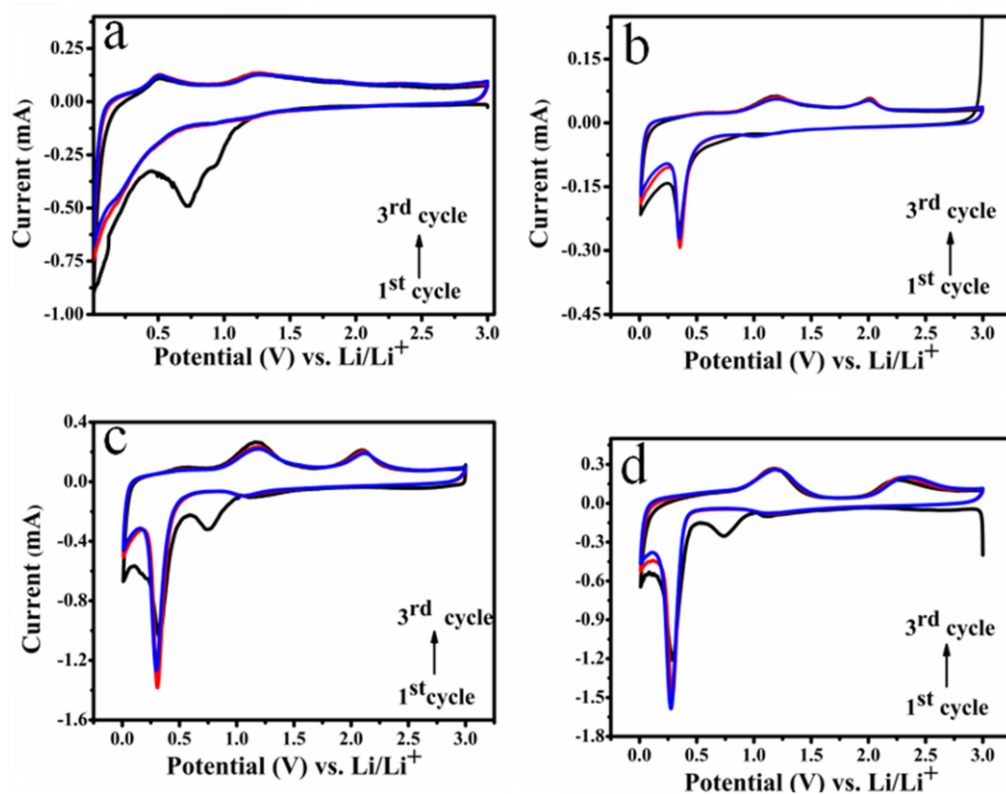

Fig. S7 CV curves of the (a) SnO<sub>2</sub>@NHCS, (b) MnO<sub>2</sub>@SnO<sub>2</sub>@NHCS-1, (c) MnO<sub>2</sub>@SnO<sub>2</sub>@NHCS-2, (d) MnO<sub>2</sub>@NHCS.

**Table S1.** Comparison of the electrochemical properties of the prepared MnO<sub>2</sub>@SnO<sub>2</sub>@NHCS-5 with previously reported anode materials for LIBs.

| Materials                                                      | Current density (mA <sub>g</sub> <sup>-1</sup> ) | Cycle numbers | Capacity (mAh <sub>g</sub> <sup>-1</sup> ) | References       |
|----------------------------------------------------------------|--------------------------------------------------|---------------|--------------------------------------------|------------------|
| <b>MnO<sub>2</sub>@SnO<sub>2</sub>@NHCS-5</b>                  | <b>100</b>                                       | <b>100</b>    | <b>1053.8</b>                              | <b>This work</b> |
| SnO <sub>2</sub> @C@VO <sub>2</sub> CHNS                       | 100                                              | 100           | 765.1                                      | 1                |
| α-Fe <sub>2</sub> O <sub>3</sub> /MnO <sub>2</sub>             | 100                                              | 150           | 860                                        | 2                |
| CF@MnO <sub>2</sub>                                            | 100                                              | 150           | 648                                        | 3                |
| Fe <sub>2</sub> O <sub>3</sub> /Co <sub>3</sub> O <sub>4</sub> | 100                                              | 50            | 500                                        | 4                |
| SnO <sub>2</sub> -C                                            | 100                                              | 30            | 492.5                                      | 5                |
| δ-MnO <sub>2</sub>                                             | 1000                                             | 100           | 320                                        | 6                |
| C/MnO                                                          | 100                                              | 100           | 943.6                                      | 7                |
| N-MnO/GNS                                                      | 100                                              | 90            | 772                                        | 8                |

## References

1. W. Guo, Y. Wang, Q. Li, D. Wang, F. Zhang, Y. Yang and Y. Yu, *ACS Appl Mater Interfaces*, 2018, **10**, 14993-15000.
2. D. Wang, Y. Wang, Q. Li, W. Guo, F. Zhang and S. Niu, *Journal of Power Sources*, 2018, **393**, 186-192.
3. Q. Han, W. Zhang, Z. Han, F. Wang, D. Geng, X. Li, Y. Li and X. Zhang, *Journal of Materials Science*, 2019, **54**, 11972-11982.
4. Z. Li, B. Li, L. Yin and Y. Qi, *ACS Appl Mater Interfaces*, 2014, **6**, 8098-8107.
5. P. Wu, N. Du, H. Zhang, J. Yu, Y. Qi and D. Yang, *Nanoscale*, 2011, **3**, 746-750.
6. W. Zhang, B. Zhang, H. Jin, P. Li, Y. Zhang, S. Ma and J. Zhang, *Ceramics International*, 2018, **44**, 20441-20448.
7. K. Liao, Q. Zhong, Z. Lv and Y. Bu, *Materials in Electronics*, 2019, **30**, 5978-5985.
8. K. Zhang, P. Han, L. Gu, L. Zhang, Z. Liu, Q. Kong, C. Zhang, S. Dong, Z. Zhang, J. Yao, H. Xu, G. Cui and L. Chen, *ACS Appl Mater Interfaces*, 2012, **4**, 658-664.
